# Supplementary material for: Genomic Sequencing of Dengue Virus Strains Associated with Papua New Guinean Outbreaks in 2016 Reveals Endemic Circulation of DENV-1 and DENV-2
Source: PubMed Central journal article supplement (PMC9768287; doi:10.4269/ajtmh.21-1292), 2022-07-05
Supplement: tpmd211292.SD1.pdf [file tpmd211292.SD1.pdf]

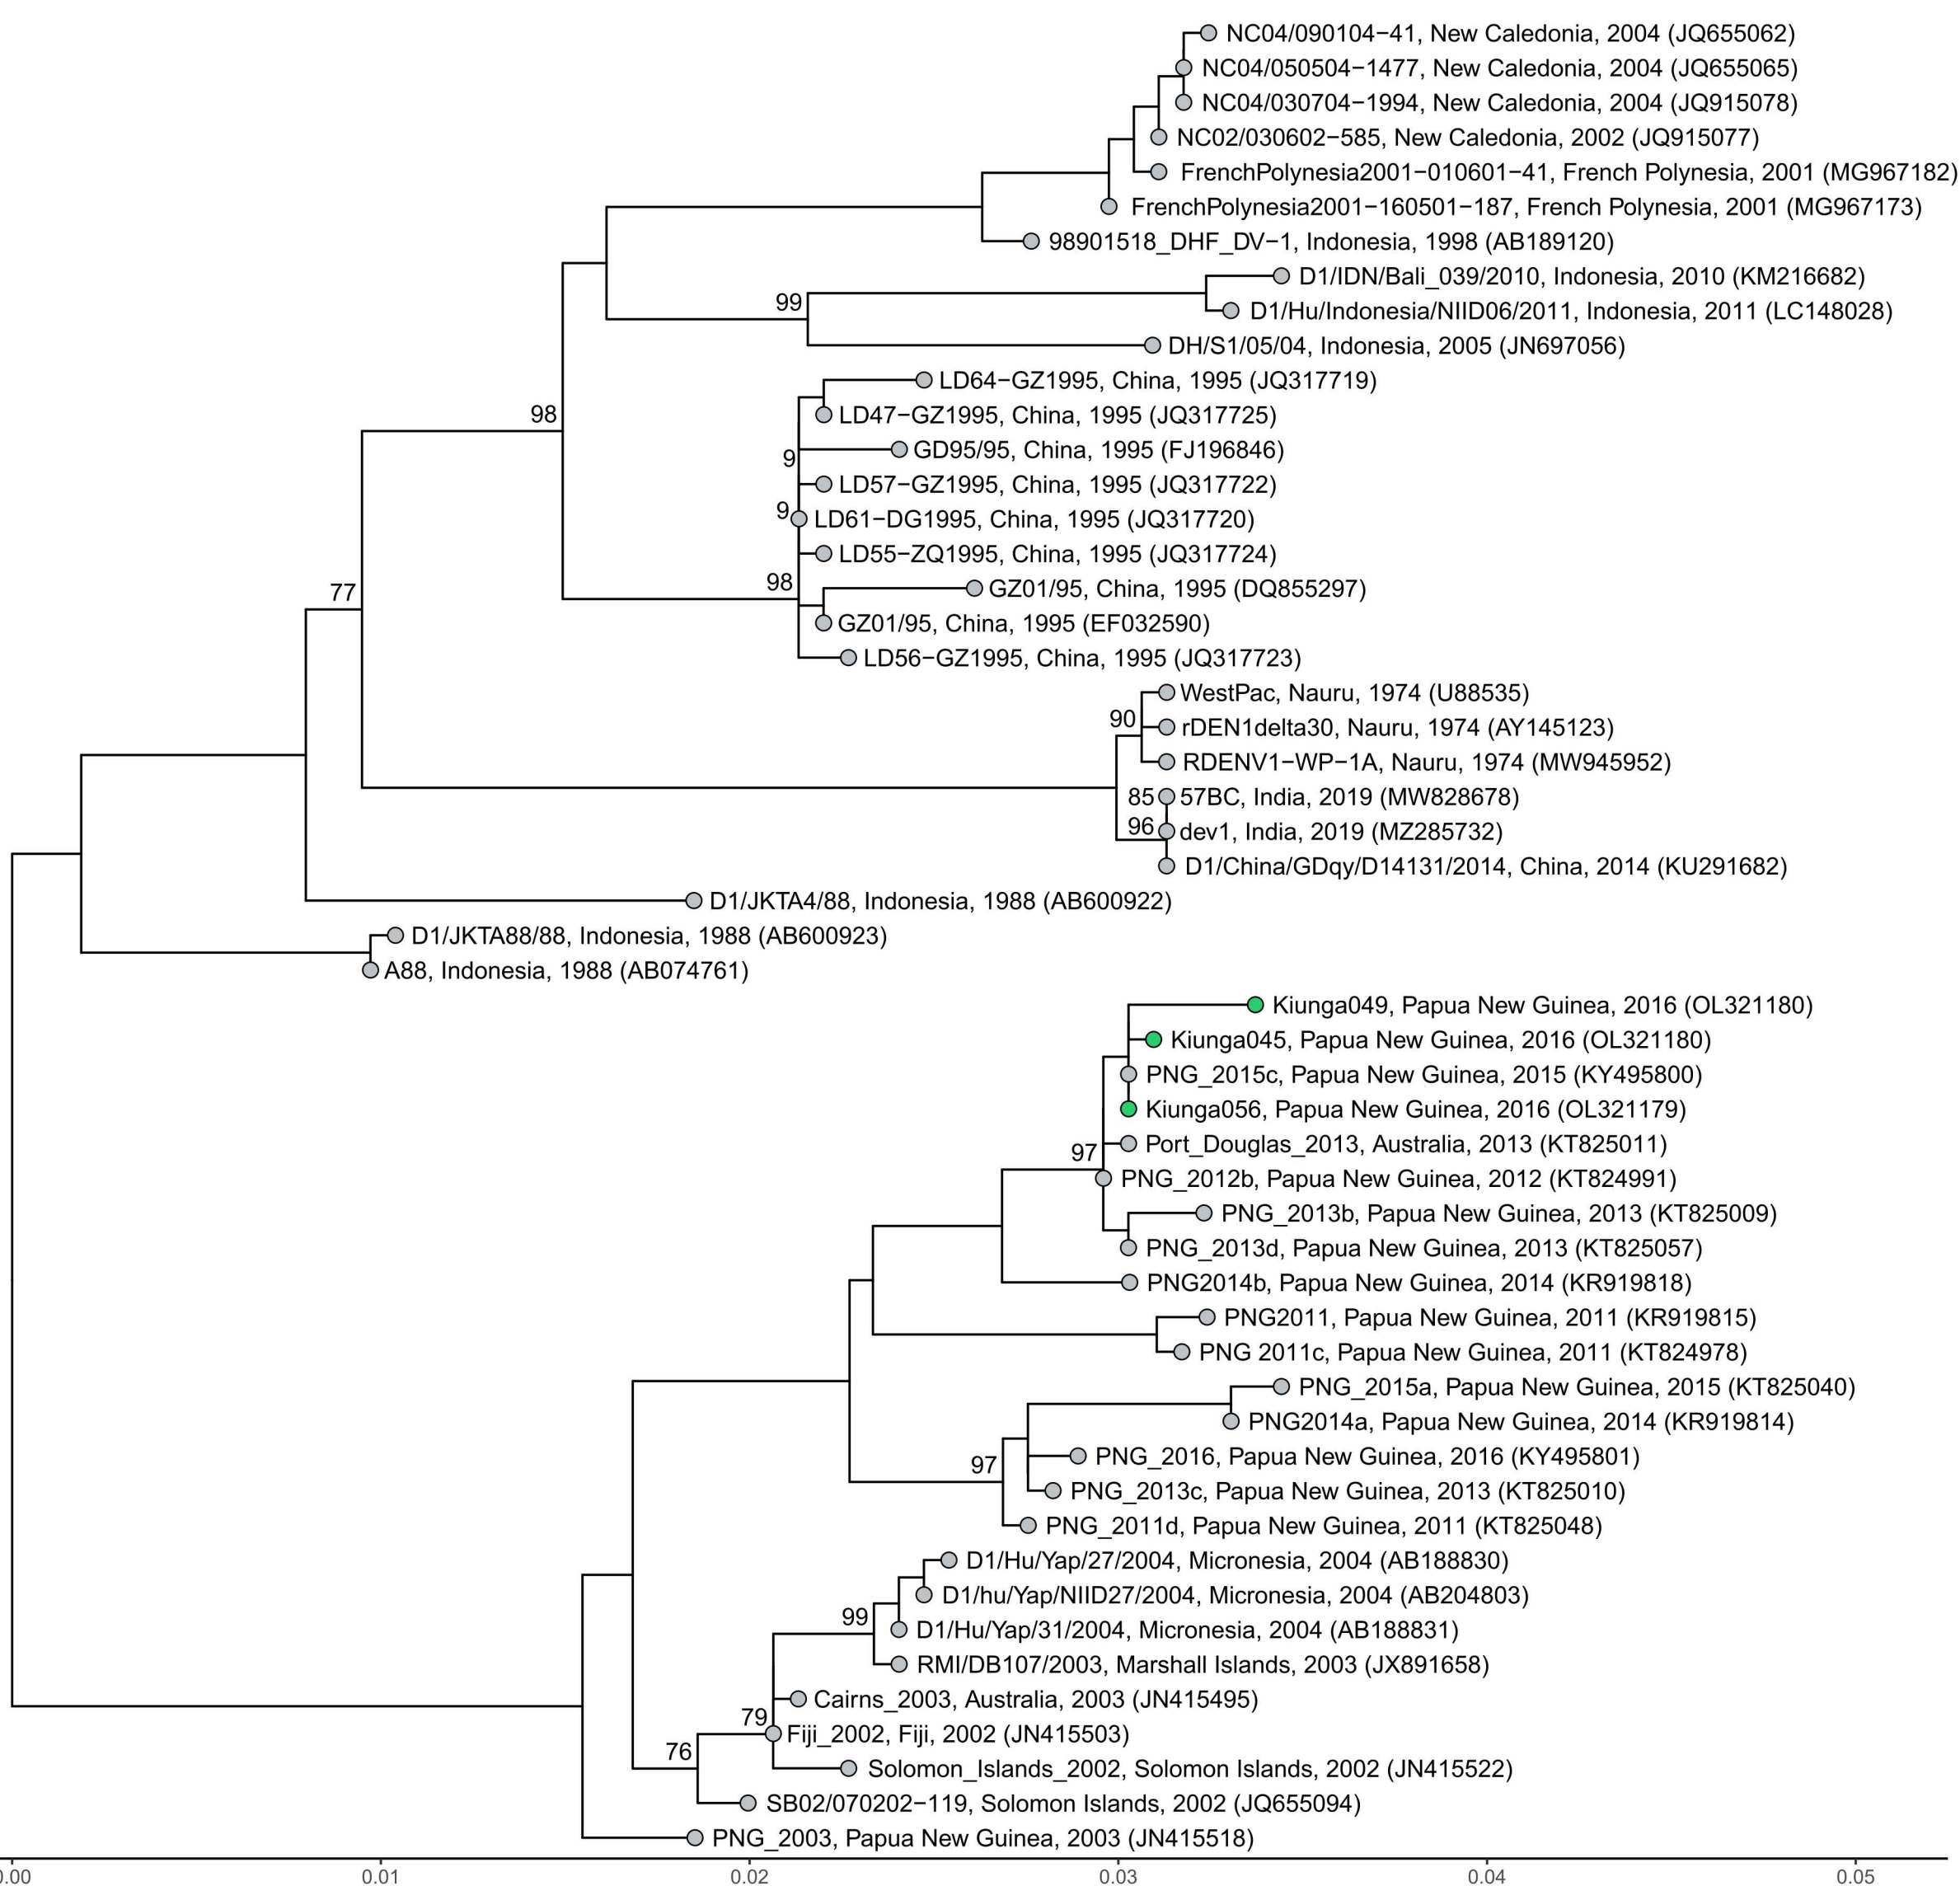

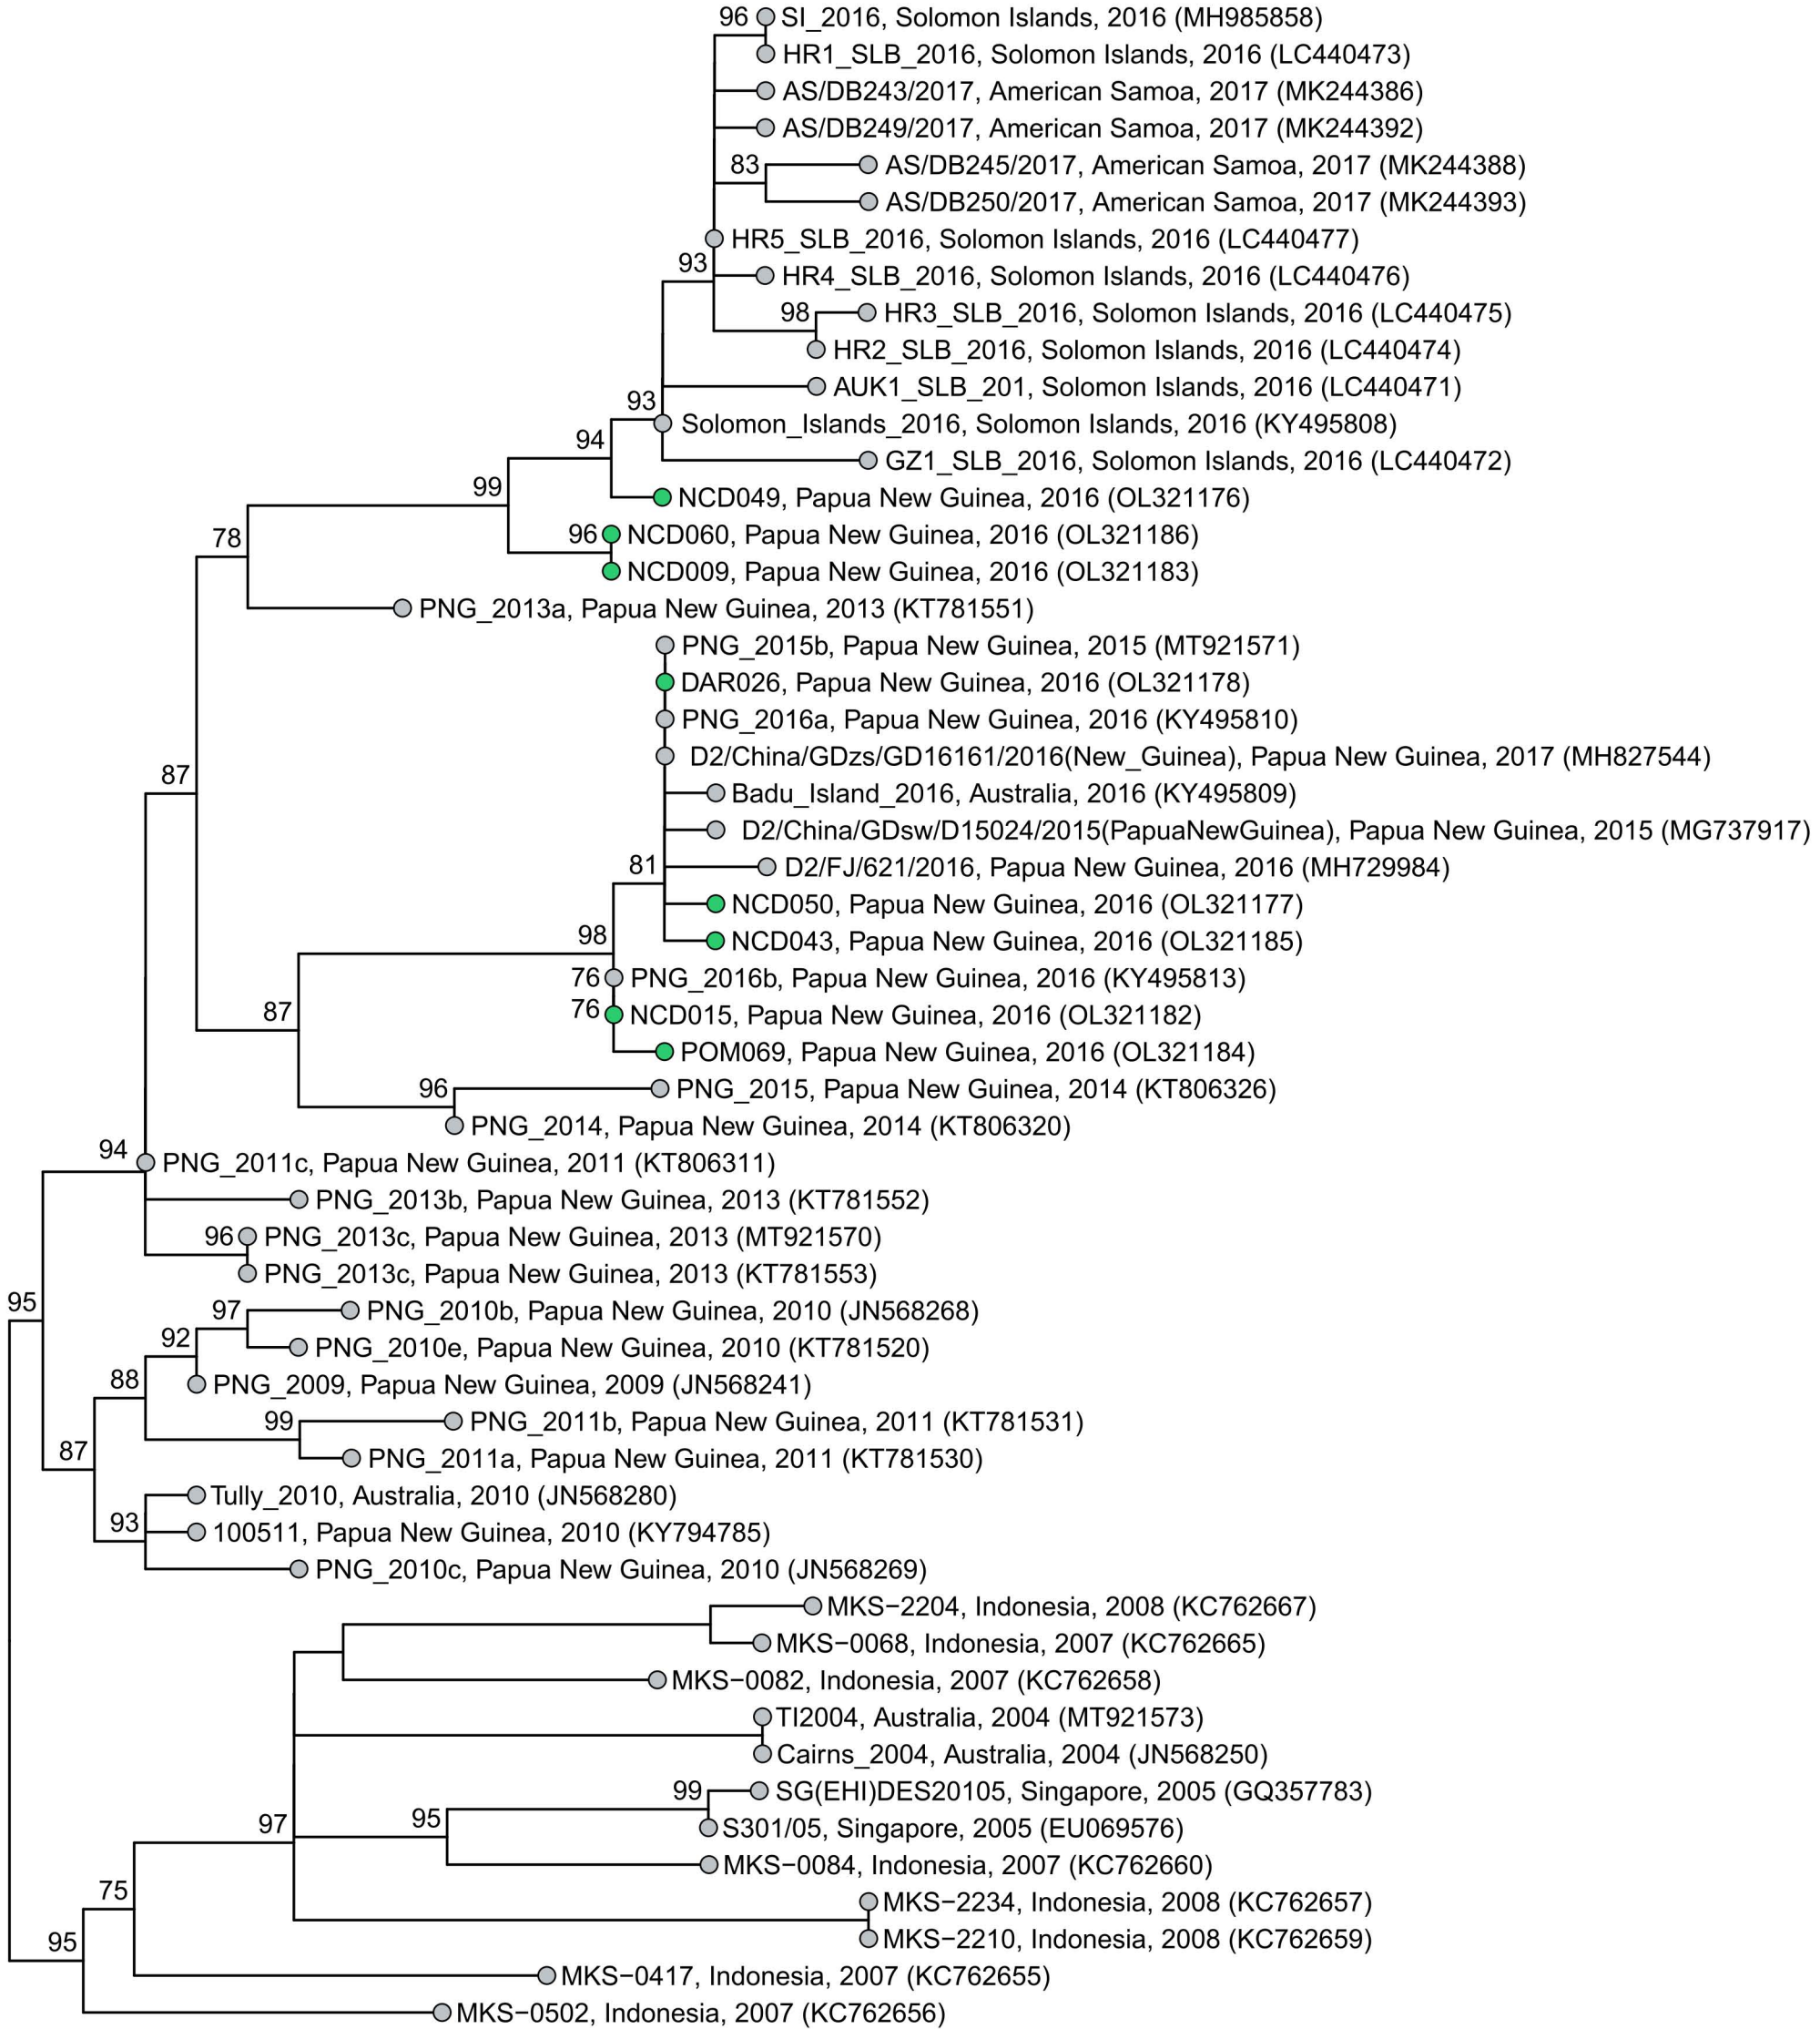

0.000 0.005 0.010 0.015 0.020
